# Supplementary material
Source: publisher figshare collection journal article supplement (https://brill.figshare.com/articles/dataset/_/22126628)
Supplement: Supplementary file 1 [file 1]

Eggs, hatching and embryos variability in Loggerhead sea turtle  
*Caretta caretta* show significant differences among nests coming  
from two Italian nesting grounds

Marco Alberto Luca Zuffi<sup>1,\*</sup>, Luna Bollaro<sup>1</sup>, Cecilia Mancusi<sup>2,3</sup>, Letizia Marsili<sup>3</sup>, Paola Nicolosi<sup>1</sup>, Giovanni Raimondi<sup>4</sup>, Giuliana Terracciano<sup>5</sup>, Chiara Caruso<sup>6</sup>, Laura Tonelli<sup>7</sup>,  
Lucia Venturi<sup>7</sup>, Toni Mingozi<sup>8</sup>

1 - Museo di Storia Naturale, Università di Pisa, 56011 Calci (Pisa). Italy

2 - ARPAT – Settore Mare, 57126 Livorno, Italy

3 - Dipartimento di Scienze Fisiche, della Terra e dell'Ambiente, Università di Siena, 53100 Siena, Italy

4 - Acquario di Livorno, Costa Edutainment, 57127 Livorno, Italy

5 - Istituto Zooprofilattico Sperimentale Lazio Toscana, 56123 Pisa, Italy

6 - Acquario di Talamone, Talamone (GR), Italy

7 - Parco Regionale della Maremma, Alberese (GR), Italy

8 - Dipartimento di Biologia, Ecologia e Scienze della Terra, Università della Calabria, 87036 Rende (CS),

Italy

\*Corresponding author; e-mail: marco.zuffi@unipi.it

ORCID iDs: Zuffi: 0000-0003-1710-9929; Mancusi: 0000-0002-7322-1985; Marsili: 0000-0002-2474-4587; Nicolosi: 0000-0003-3749-7295; Terracciano: 0000-0001-8415-6077; Caruso: 0000-0002-6738-0293; Venturi: 0000-0002-0559-9660; Mingozi: 0000-0002-3119-1124

**Supplementary material**
